# Supplementary material
Source: PubMed Central journal article supplement (PMC5127674)
Supplement: jci-126-86505-s001.pdf [file jci-126-86505-s001.pdf]

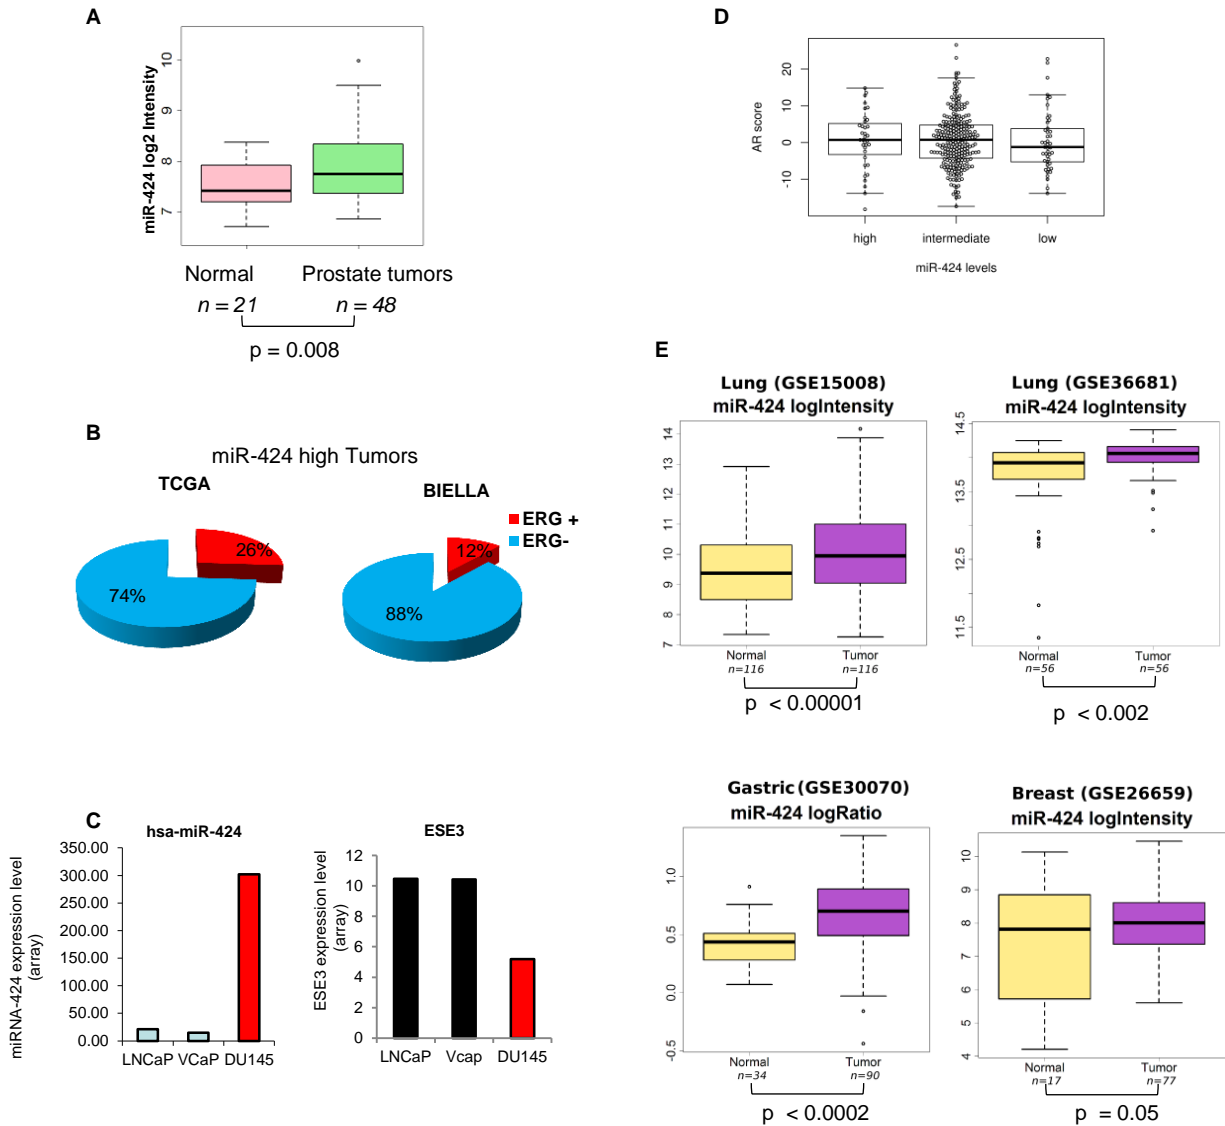

**Supplementary Figure 1. miR-424 is upregulated in ERG negative tumors and associated with aggressive features.** (A) miR-424 log<sub>2</sub> intensity levels evaluated by microarray in Normal and Prostate tumors. p-value is indicated (B) Percentage of ERG positive tumors among miR-424 high and miR-424 low tumors in TCGA and BIELLA cohorts. (C) miR-424 (left) and ESE3 (right) level evaluated by microarray in indicated cell lines. (D) AR scores of prostate tumors divided according to their level of miR-424 in the TCGA dataset. (E) miR-424 level evaluated by microarray in indicated tumour datasets. p values of modified t-test are indicated.

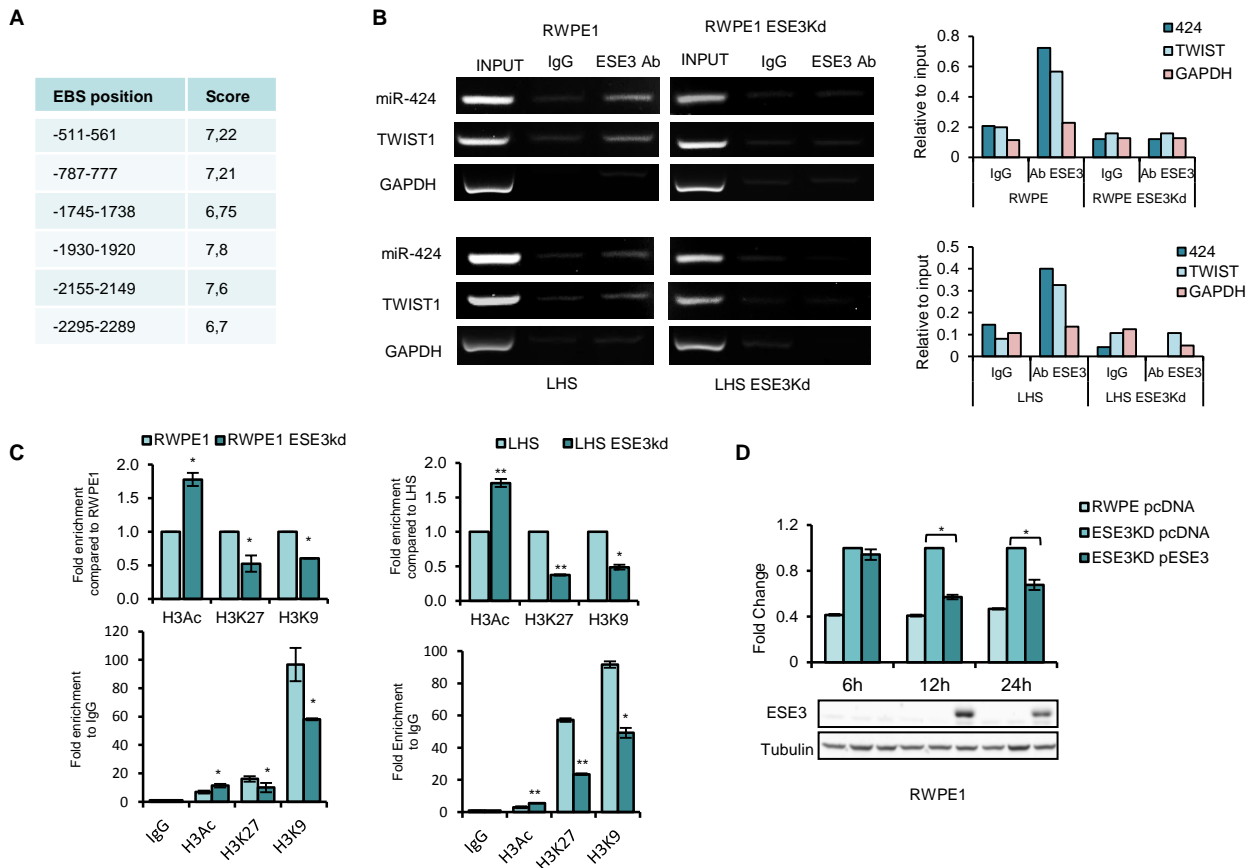

**Supplementary Figure 2. ESE3/EHF occupies miR-424 promoter region and represses miR-424 transcription.** (A) Position and scores of ETS binding sites evaluated on miR-424 promoter and identified using *MotifViz* (B) ESE3 occupancy on TWIST1 promoter and GAPDH promoter evaluated by end point PCR as positive control and negative control, respectively. (C) *Top panels*, Histone 3 acetylation (H3Ac), lysine 27 and lysine 9 methylation (H3K27 and H3K9) occupancy on miR-424 promoter evaluated by ChIP in indicated cell lines. The results were normalized on IgG and represented as fold enrichment relative to the parental cell line. *Lower panels*, ChIP data presented as fold enrichment relative to IgG. (D) miR-424 level evaluated by qRT-PCR in RWPE1 control (CTR) and ESE3Kd cells following ectopic expression of ESE3 (pESE3) or control vector (pcDNA) at the indicated time points. *Lower panel*, Immunoblot of ESE3/EHF at indicated time points following overexpression of pESE3 (*lower*). The values are normalized to RNU6 and represented as miR-424 expression relative to pcDNA transfected RWPE1 ESE3Kd cells. Data show mean  $\pm$  s.d. (n=3). \* $p \leq 0.05$  \*\* $p \leq 0.01$  by two-tailed Student's t-test. n.s, not significant.

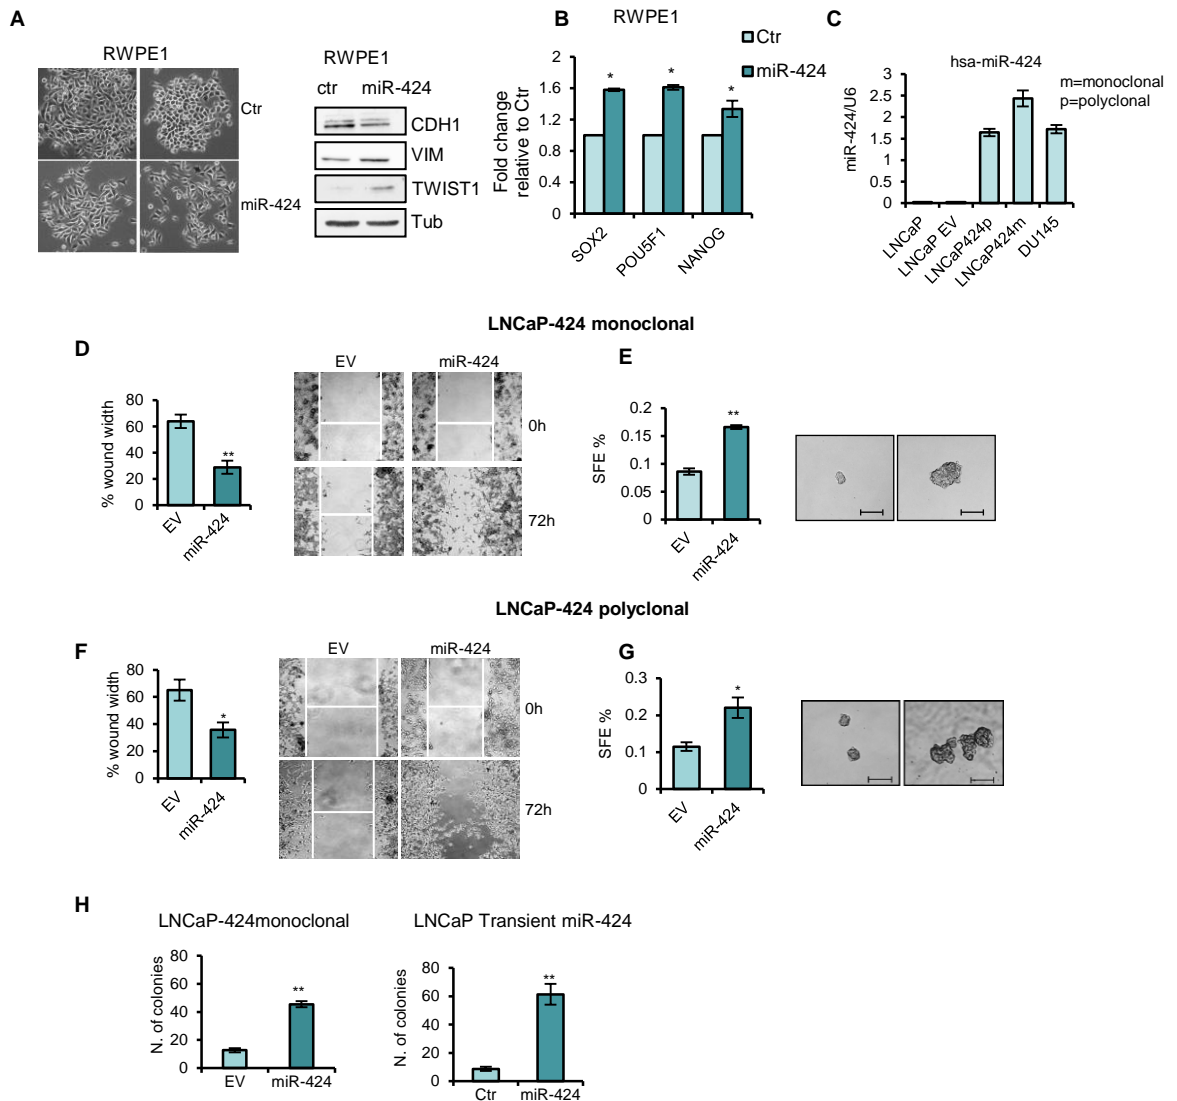

**Supplementary Figure 3. Transient and stable expression of miR-424 sustains malignant phenotypes in multiple cell models.** (A) Phase-contrast pictures showing cell morphology (*left*) and western blot for indicated EMT markers (*right*) (B) Expression of CSCs markers evaluated in RWPE1 72h following miR-424 overexpression. (C) Level of miR-424 evaluated by qRT-PCR in indicated cell lines. (D-E), cell migration by WH (D), SFE and representative images of spheroids (E) evaluated in LNCaP-424 monoclonal cells. Empty-vector (EV). (F-G), cell migration by WH (F), SFE and representative images of spheroids (G) evaluated in LNCaP-424 polyclonal cells. Empty-vector (EV). (H) Colony formation in soft agar in LNCaP-424 monoclonal cells (*left*) and following transient transfection of miR-424 precursor (miR-424) or negative control (Ctr) in LNCaP cells (*right*). Data show mean  $\pm$  s.d. (n=3). \* $p \leq 0.05$  \*\*  $p \leq 0.01$  by two-tailed Student's t-test. Scale bars: 200 $\mu$ m

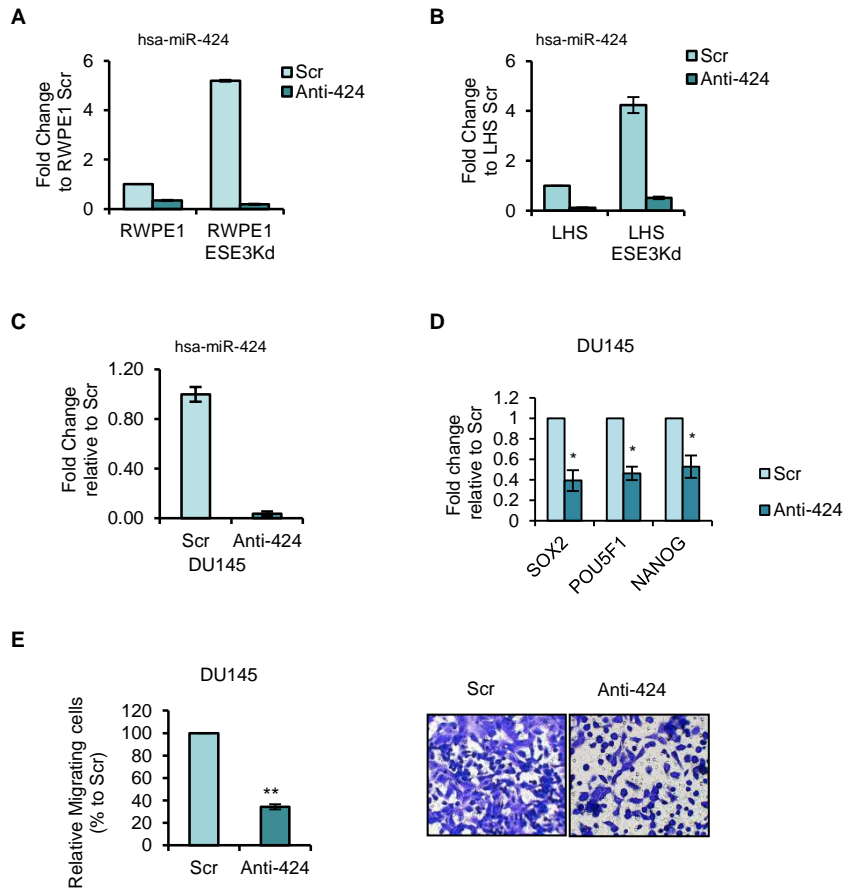

**Supplementary Fig. 4. miR-424 induces CSCs markers.** (A-C) miR-424 level evaluated by qRT-PCR 24 h following transfection of anti-miR-424 in the indicated cell lines. The miRNA level was normalized to RNU6 and represented as fold change relative to the indicated Scr control. (D) Expression of CSCs markers in DU145 cells 72h following anti-miR-424 transfection. (E) Cell migration and invasion by the Boyden chamber assay following anti-miR-424 transfection. Percentage of invading cells (*left*) and images of invading cells (*right*). The assay was done in triplicate and the value represent the mean  $\pm$  s.d. of two independent experiments.

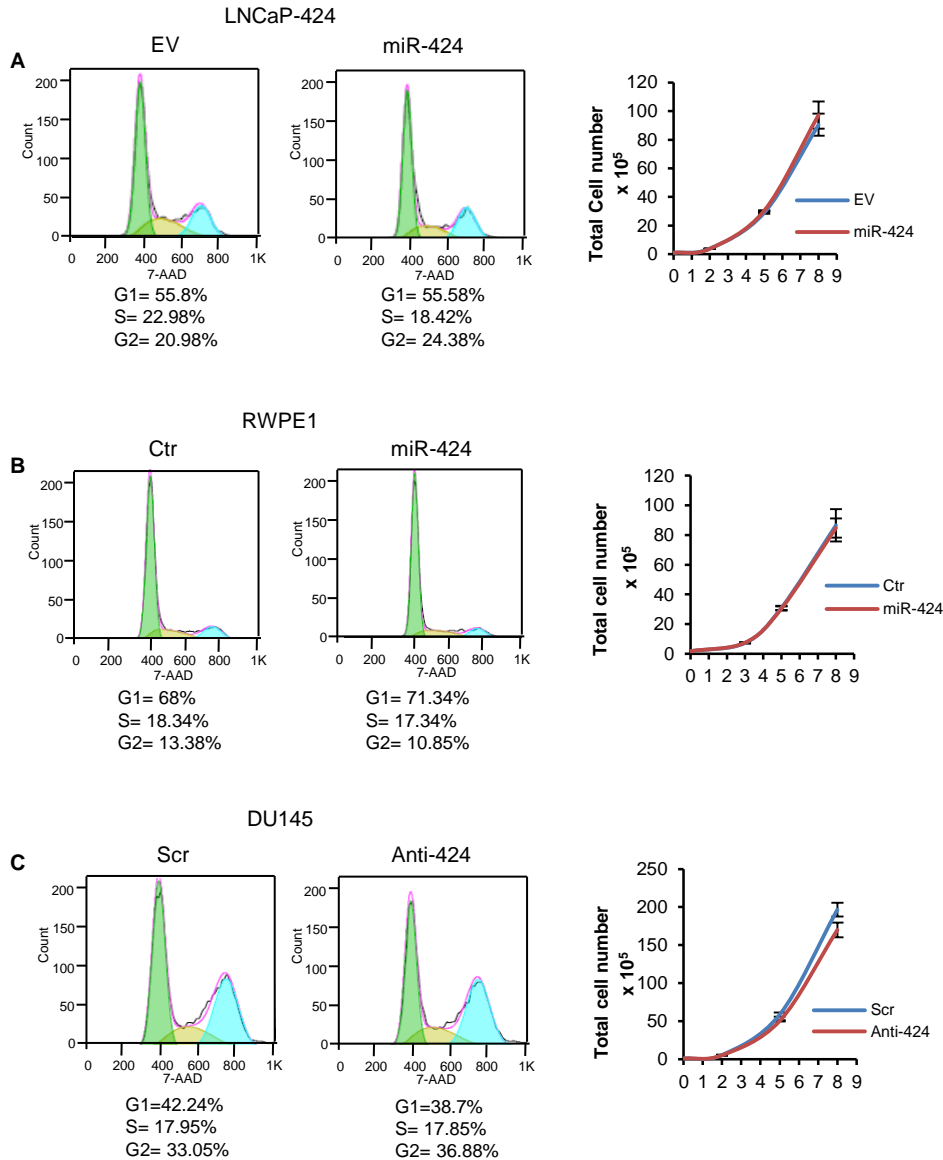

**Supplementary Figure 5. miR-424 does not affect cell cycle and cell proliferation in vitro.**

(A-C) Cell cycle analysis by 7AAD staining (*left panels*) and cell proliferation assay (*right panels*) were performed in LNCaP-424 monoclonal cell line (A) and RWPE1 cells (B) following miR-424 overexpression and in DU145 cells (C) following miR-424 inhibition by anti-miR-424. Cell cycle analysis were performed 72h after cell seeding or transfection and percentage of cells in G1, S and G2 are indicated. Cell counts for cell proliferation assay were done at the indicated time points up to 8 days following cell seeding.

**A EHF/RFWD2/COP1 POSITIVE CORRELATION IN EPITHELIAL TUMORS**

|                                         | correlation (pearson r) | significance (p-val) |
|-----------------------------------------|-------------------------|----------------------|
| <b>Primary prostate cancer</b>          |                         |                      |
| Chandran (n=10)                         | 0.87                    | 0.0012               |
| Taylor (n=131)                          | 0.63                    | <0.00001             |
| Gulzar (n=72)                           | 0.43                    | 0.0004               |
| Erho (n=545)                            | 0.36                    | <2x10 <sup>-16</sup> |
| Grasso (n=59)                           | 0.30                    | 0.020                |
| <b>Prostate cancer metastasis</b>       |                         |                      |
| Chandran (n=21)                         | 0.48                    | 0.029                |
| <b>Other tumors (Pancancer study)</b>   |                         |                      |
| Kidney Papillary Cell Carcinoma (n=161) | 0.22                    | 0.0052               |
| Breast (n=991)                          | 0.20                    | <0.00001             |
| Kidney Clear Cell Carcinoma (n=506)     | 0.19                    | <0.00001             |
| Thyroid Cancer (n=492)                  | 0.17                    | 0.0001               |
| Bladder (n=211)                         | 0.16                    | 0.017                |

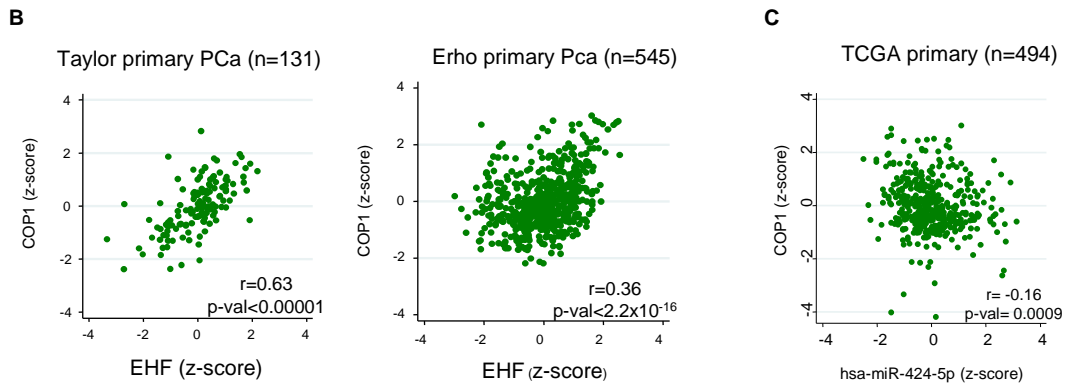

**Supplementary Figure 6. ESE3/EHF and RFWD2/COP1 are correlated in prostate tumours.** (A) Pearson correlation analysis showing positive correlation between ESE3/EHF and RFWD2/COP1 mRNA in multiple epithelial cancers. (B) Correlation plots in Taylor and Erho datasets. Pearson value and significance are indicated. (C) Pearson distribution plot showing significant inverse correlation between miR-424 and RFWD2/COP1 mRNA level in primary prostate tumours TCGA dataset) ( $r=-0.16$ ;  $p<0.0009$ ). (see Material and Methods for further details).

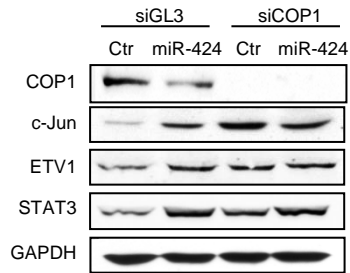

**Supplementary Figure 7. miR-424 acts through COP1 repression.** Immunoblot for c-Jun, ETV1, STAT3 and COP1 in RWPE cells 48h following co-transfection with siRNA against COP1 or control siRNA (siGL3) and pre-miR424 or Ctr.

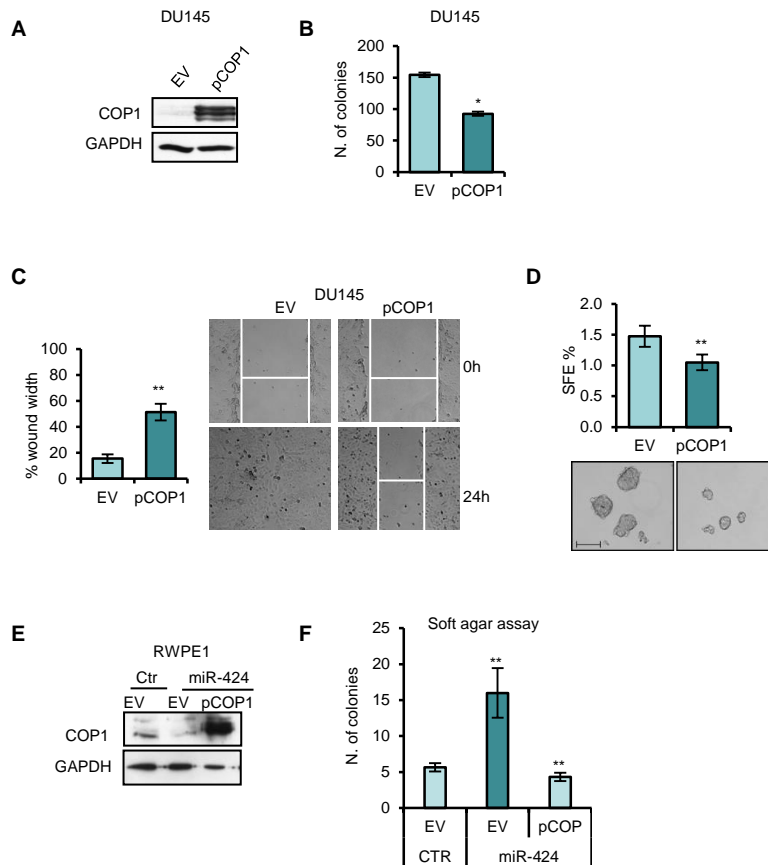

**Supplementary Figure 8. COP1 overexpression reverts malignant phenotypes in DU145 prostate cancer cells and the oncogenic effects of miR-424 in normal prostate epithelial cells. (A-D)** Immunoblot of COP1 (A), colony formation in soft agar (B), cell migration by WH (C) and SFE and representative images of spheroid (D) following transfection of FLAG-COP1 (pCOP1) or Empty-vector (EV) in DU145 cells. (E) Immunoblot of COP1 following transfection of FLAG-COP1 (pCOP1) or Empty-vector (EV) along with control and miR-424 in RWPE1 cells. (F) Colony formation in soft agar in RWPE1 transfected as described in E. Data shown mean  $\pm$  s.d. (n=3) of one representative experiment. \* $p \leq 0.05$  \*\*  $p \leq 0.01$  by two-tailed Student's t-test.



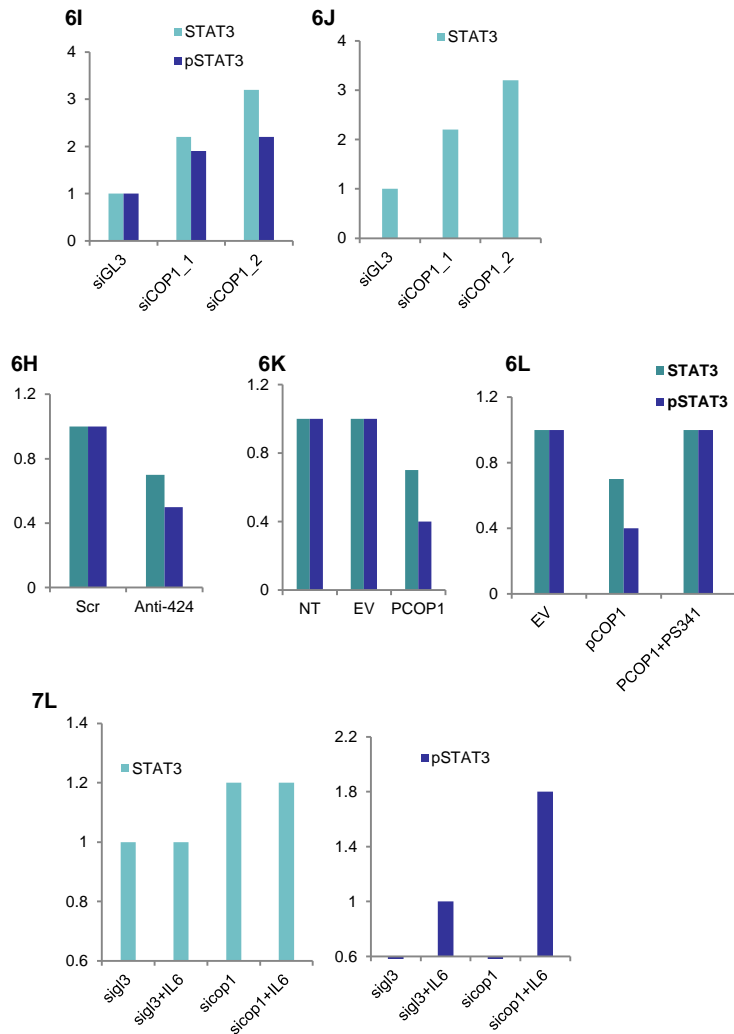

**Supplementary Figure 9. Densitometric analysis of western-blot related to figures 6I,6J,6H,6K 6L and 7L.**

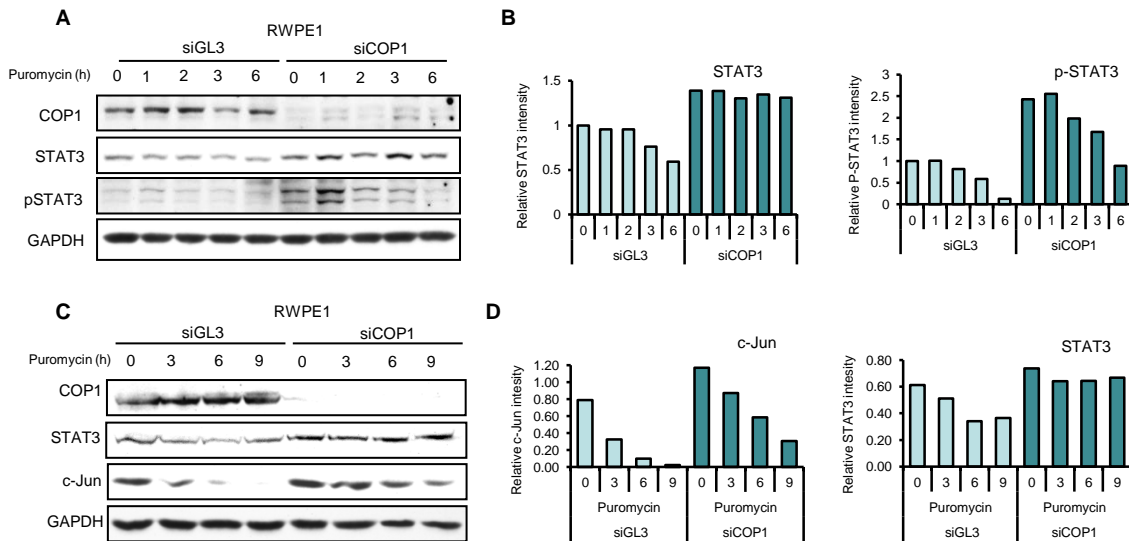

**Supplementary Figure 10. COP1 induces STAT3 ubiquitination and degradation.** (A-C) IB of indicated protein in RWPE1 cells transfected with siCOP1#1 or siGL3 and treated with puromycin (50 $\mu$ M) for the indicated time points. c-Jun and GAPDH were evaluated as controls (B-D). Densitometric analysis relative to STAT3, p-STAT3 and c-Jun bands are shown .

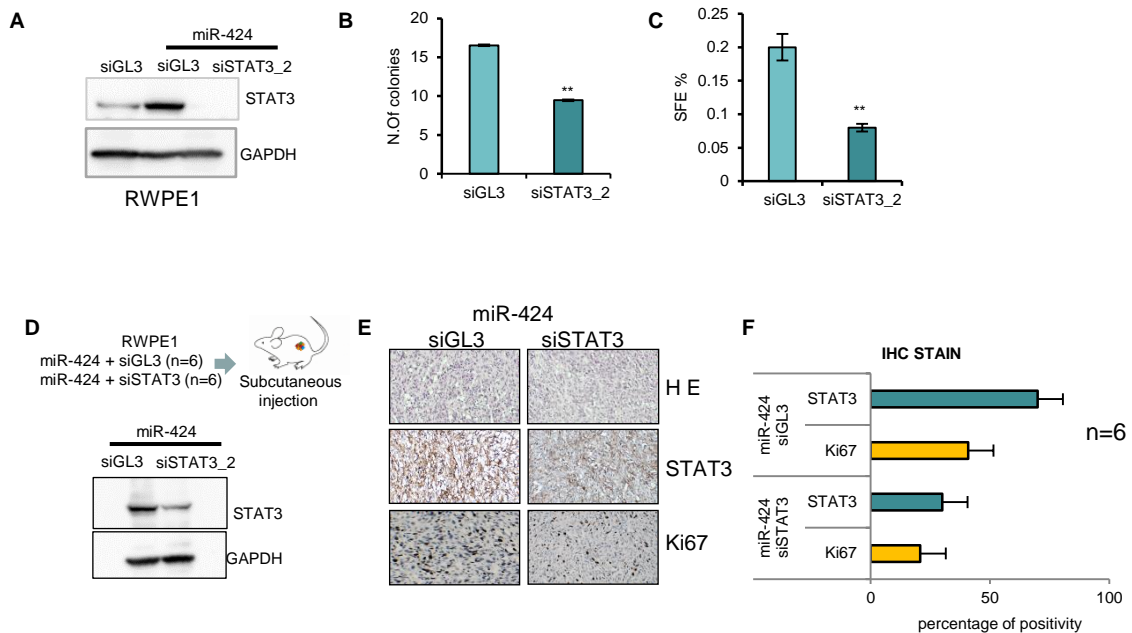

**Supplementary Figure 11. STAT3 ablation rescues the oncogenic effects of miR-424 in vitro and in vivo.**

(A-C) Immunoblot (IB) of STAT3 (A), colony formation in soft agar (B) and SFE (C) in RWPE1 cells following co-transfection with miR-424 or Ctr and siRNA targeting STAT3 (siSTAT3\_n2) or control siRNA (siGL3). (D), Schematic of the experimental plan and (lower) immunoblot of STAT3 following knockdown with siRNA\_n1 in RWPE1 cells before the engraftment. (E) Representative images of H&E, immunostaining (20X magnification) and IHC scores (% of positive cells). Differences in stain of indicated proteins between siGL3 and siSTAT3 were statistically significant ( $p < 0.01$ ).

List of 323 predicted miR-424 targets in prostate epithelial cells

ABCB8  
ABCF1  
ABCF2  
ACTR2  
ACVR2B  
ADD2  
ADSS  
AHCYL2  
AHNAK2  
ANAPC13  
ANGEL1  
ANKRD12  
ANKRD46  
AP1S3  
AP2A1  
AP2B1  
AP3B1  
APP  
ARFRP1  
ARHGAP12  
ARHGAP5  
ARHGDIA  
ARL10  
ARL2  
ATF6  
ATG9A  
ATP13A2  
ATP13A3  
ATXN2  
ATXN7L1  
ATXN7L3  
B4GALT1  
BCL7A  
BCL9L  
BCR  
BIK  
BLCAP  
BMS1  
BTBD2  
BTG2  
BTRC  
C10orf54  
C11orf24  
C11orf45  
C14orf126  
C14orf37  
C1orf190  
C20orf29  
C9orf100

C9orf102  
CAB39L  
CAMK2G  
CAPRIN1  
CARD10  
CARM1  
CASK  
CBFB  
CC2D1B  
CCDC19  
CCND1  
CCND2  
CCND3  
CCNE1  
CCNF  
CCNG1  
CDC25A  
CDC37L1  
CDC42EP2  
CDCA4  
CDK6  
CHD6  
CHMP4B  
CHORDC1  
CHPT1  
CHUK  
CLASP1  
CLCN3  
CLCN6  
CLDN12  
CLOCK  
CMTM4  
CNNM2  
CNOT6L  
CNTNAP1  
COBLL1  
COPS7B  
CRYZL1  
CTNND1  
CUL2  
CYB561  
CYP26B1  
CYP27B1  
CYP2S1  
DCTN5  
DENR  
DNAJC16  
DSCR3  
EEA1  
EFTUD2

EIF5A  
ENPP4  
ENTPD6  
ENTPD7  
EPB41L4B  
ERAL1  
ESRRG  
EXT2  
FAM123B  
FAM54B  
FAM81A  
FAM91A1  
FAT2  
FBXW7  
FCF1  
FGF11  
FKBP1A  
FKBP1B  
FLCN  
FLOT2  
G6PD  
GALNT7  
GATA4  
GCC1  
GCLC  
GIT1  
GLS  
GPATCH8  
GYS1  
HARS2  
HMGA1  
HOXA10  
HOXC11  
HR  
HSPG2  
IARS  
IGF2R  
IKBKB  
JRK  
KBTBD4  
KCMF1  
KCNN4  
KCTD1  
KIAA0317  
KIAA0895  
KIF1B  
KIF21A  
KIF3B  
KLHDC8B  
KLHL26

KPNA6  
LMO7  
LSM11  
LYPLA2  
MAP2K3  
MAPK3  
MAPKAP1  
MARK4  
MFN2  
MINK1  
MMD  
MMP3  
MMS19  
MRPS2  
MS4A7  
MTHFR  
MYB  
MYO1E  
NCKIPSD  
NEO1  
NF1  
NFE2L1  
NFS1  
NMD3  
NMT1  
NOTCH2  
NRBP1  
NUCB1  
NUDCD3  
NUP188  
OLR1  
OOEP  
OS9  
PA2G4  
PAFAH2  
PCMT1  
PDIK1L  
PDLIM2  
PDPR  
PER3  
PERP  
PEX12  
PEX13  
PHF19  
PHF20  
PHLDA3  
PI4KB  
PIP4K2C  
PLEKHA1  
PLEKHA5

PLEKHB2  
PLRG1  
PNPLA6  
POLL  
POLR3F  
PPP1R11  
PPP1R13B  
PPP2R1A  
PRDM4  
PRKAR2A  
PTPN3  
PTRF  
PURA  
RAB10  
RAB4B  
RANBP3  
RAP2C  
RAPGEF1  
RAPGEF5  
RAPGEFL1  
RASSF5  
RCE1  
RFK  
RFWD2  
RFWD3  
RIMS3  
RNF138  
RNF144B  
RNF216  
RNF217  
RNGTT  
RPS6KA3  
SAMD10  
SCOC  
SETD3  
SFT2D3  
SGSM2  
SH3BGR2  
SHROOM4  
SIDT2  
SIRT4  
SLC11A2  
SLC20A2  
SLC22A13  
SLC25A22  
SLC35A4  
SLC35E4  
SLC37A2  
SLC38A9  
SLC39A9



SLC44A2  
SLC45A3  
SLC7A2  
SLC9A1  
SLC9A6  
SMAP2  
SMPD1  
SMURF1  
SMYD5  
SNCG  
SNX18  
SPAG7  
SPRED1  
SPRYD3  
SPTLC1  
SSRP1  
SSU72  
STIM1  
STK33  
STK35  
SUMO3  
SUPT16H  
SYT15  
TARBP2  
TBC1D13  
TBC1D19  
TBC1D24  
TBPL1  
TFCP2L1  
TMCC1  
TMC07  
TMEM109  
TMEM161B  
TMEM43  
TMEM55B  
TNFSF9  
TNIP1  
TNS1  
TOLLIP  
TOM1L2  
TOMM34  
TPRG1L  
TRIOBP  
TRIP10  
UBAC1  
UBE2B  
UBE2Q1  
UBE3C  
UBE4A  
UBE4B

UBR3  
USP14  
USP15  
VAC14  
VAMP8  
VAT1  
VCL  
VPS33B  
VPS4A  
VTA1  
VTI1B  
WBP11  
WHSC1  
XPO5  
XPR1  
YTHDC1  
ZBTB39  
ZDHHC14  
ZHX1  
ZIK1  
ZNF501  
ZNF622  
ZNRF2  
ZYG

## Supplemental Table 2

ANAPC13  
BTRC  
C14orf146  
CUL2  
FBXW7  
FKBP1A  
HARS2  
KCMF1  
KIAA0317  
LMO7  
PEX13  
RCE1  
RFWD2  
RNF138  
RNF144B  
RNF217  
SMURF1  
SUMO3  
UBAC1  
UBE2B  
UBE2Q1  
UBE3C  
UBE4A  
UBE4B  
UBR3  
USP14  
USP15  
ZNRF2  
RNF216

Supplementary Table 3.

Primers sets used for qRT-PCR

| <i>GENE</i>       | <i>SEQUENCE</i>             |
|-------------------|-----------------------------|
| <i>COPI FWD</i>   | 5'-ACGACCTTTAGCCACATTGT-3'  |
| <i>COPI REV</i>   | 5'- TAACTCCAGCAATCGCAAAA-3' |
| <i>ACTIN FWD</i>  | 5'-ATTGGCAATGAGCGGTTC-3'    |
| <i>ACTIN REV</i>  | 5'-GGATGCCACAGGACTCCAT-3'   |
| <i>MYC-C FWD</i>  | 5'-GGTGCTCCATGAGGAGACA-3'   |
| <i>MYC-C REV</i>  | 5'-CCTGCCTCTTTCCACAGAA-3'   |
| <i>STAT3 FWD</i>  | 5'-GGAGGAGTTGCAGCAAAAAG-3'  |
| <i>STAT3 REV</i>  | 5'-GATTCTCTCCTCCAGCATCG-3'  |
| <i>IL6 FWD</i>    | 5'-CCACACAGACAGCCACTCAC-3'  |
| <i>IL6 REV</i>    | 5'-TTTCAGCCATCTTTGGAAGG-3'  |
| <i>DDIT4 FWD</i>  | 5'-GGTTCGCACACCCATTCAAG-3'  |
| <i>DDIT4 REV</i>  | 5'-TAGGCATGGTGAGGACAGAC-3'  |
| <i>NANOG FWD</i>  | 5'-CAGTCTGGACACTGGCTGAA-3'  |
| <i>NANOG REV</i>  | 5'-CTCGCTGATTAGGCTCCAAC-3'  |
| <i>POU5F1 FWD</i> | 5'-AGCGATCAAGCAGCGACTAT-3'  |
| <i>POU5F1 REV</i> | 5'-TAGCCTGGGGTACCAAAATG-3'  |
| <i>SOX2 FWD</i>   | 5'-AACCCCAAGATGCACAAC-3'    |
| <i>SOX2 REV</i>   | 5'-GCTTAGCCTCGTCGATGAAC-3'  |
| <i>ESE3 FWD</i>   | 5'-TGCAGCATCTGAAGTGGAAC-3'  |
| <i>ESE3 REV</i>   | 5'-AGGAAGGTGACTGGTGGTTG-3'  |

**Supplemental Table 4**

| sample_ID | expression profiling | Age | Gleason Score | Grading_G | pT | pN | pM |
|-----------|----------------------|-----|---------------|-----------|----|----|----|
| A5        | miR and GEP          | 70  | 8             | 3         | 3A | 0  | 0  |
| A9        | miR and GEP          | 67  | 6             | 2         | 2A | 0  | 0  |
| CC35      | miR and GEP          | 65  | 6             | 2         | 3A | x  | 0  |
| CC62      | miR and GEP          | 70  | 7             | 3         | 2C | 0  | 0  |
| CC75      | miR and GEP          | 66  | 7             | 3         | 3B | x  | 0  |
| CC83      | miR and GEP          | 67  | 7             | 3         | 3A | x  | 0  |
| D40       | miR and GEP          | 50  | 7             | 2         | 2C | 0  | 0  |
| CC91      | miR and GEP          | 71  | 7             | 3         | 3B | 0  | 0  |
| L12       | miR and GEP          | 65  | 7             | 2         | 2C | 0  | 0  |
| Y48       | miR and GEP          | 65  | 7             | 2         | 3B | x  | 0  |
| CC17      | miR and GEP          | 63  | 8             | 3         | 3A | 0  | 0  |
| CC87      | miR and GEP          | 70  | 9             | 3         | 3B | 0  | 0  |
| G70       | miR and GEP          | 73  | 7             | 2         | 2B | x  | 0  |
| P55       | miR and GEP          | 72  | 7             | 2         | 2C | x  | 0  |
| P60       | miR and GEP          | 64  | 8             | 3         | 2C | 0  | 0  |
| W25       | miR and GEP          | 69  | 8             | 3         | 3A | 0  | 0  |
| W28       | miR and GEP          | 61  | 6             | 2         | 2C | x  | 0  |
| Y44       | miR and GEP          | 62  | 6             | 2         | 2C | x  | 0  |
| A3        | miR and GEP          | 67  | 7             | 2         | 2B | 0  | 0  |
| B11       | miR and GEP          | 68  | 7             | 2         | 2C | x  | 0  |
| B17       | miR and GEP          | 71  | 7             | 2         | 2A | x  | 0  |
| BB5       | miR and GEP          | 61  | 7             | 2         | 2C | 0  | 0  |
| C25       | miR and GEP          | 65  | 7             | 2         | 3A | 0  | 0  |
| C27       | miR and GEP          | 73  | 7             | 2         | 2A | x  | 0  |
| L16       | miR and GEP          | 72  | 7             | 2         | 2C | 0  | 0  |
| M26       | miR and GEP          | 61  | 7             | 2         | 2C | x  | 0  |
| Q70       | miR and GEP          | 62  | 6             | 2         | 2C | x  | 0  |
| V18       | miR and GEP          | 68  | 7             | 2         | 2C | x  | 0  |
| Z56       | miR and GEP          | 64  | 7             | 2         | 3A | x  | 0  |
| AA65      | miR and GEP          | 69  | 7             | 2         | 2C | 0  | 0  |
| AA69      | miR and GEP          | 68  | 6             | 2         | 2C | 0  | 0  |
| B12       | miR and GEP          | 72  | 6             | 2         | 2C | x  | 0  |
| CC3       | miR and GEP          | 55  | 7             | 2         | 3B | 0  | 0  |
| CC41      | miR and GEP          | 67  | 7             | 3         | 2C | x  | 0  |
| CC8       | miR and GEP          | 70  | 6             | 2         | 3A | x  | 0  |
| D36       | miR and GEP          | 73  | 7             | 2         | 3A | x  | 0  |
| E50       | miR and GEP          | 67  | 8             | 3         | 3A | 0  | 0  |
| G64       | miR and GEP          | 70  | 9             | 3         | 3A | 0  | 0  |
| Y50       | miR and GEP          | 63  | 7             | 2         | 2A | x  | 0  |
| AA90      | miR and GEP          | 65  | 7             | 2         | 2C | 0  | 0  |
| AA97      | miR and GEP          | 59  | 7             | 2         | 3A | x  | 0  |
| H75       | miR and GEP          | 70  | 7             | 2         | 2B | x  | 0  |
| K6        | miR and GEP          | 67  | 9             | 3         | 2C | 0  | 0  |
| P51       | miR and GEP          | 53  | 8             | 3         | 4  | 1  | 0  |
| P57       | miR and GEP          | 69  | 8             | 3         | 2C | x  | 0  |
| X40       | miR and GEP          | 68  | 6             | 2         | 2A | x  | 0  |
| Z55       | miR and GEP          | 52  | 6             | 2         | 2C | x  | 0  |
| Z59       | miR and GEP          | 57  | 6             | 2         | 2C | x  | 0  |
